# Supplementary material for: GSTA1 diplotypes affect busulfan clearance and toxicity in children undergoing allogeneic hematopoietic stem cell transplantation: a multicenter study
Source: PubMed Central journal article supplement (PMC5710889; doi:10.18632/oncotarget.20310), 2017-08-27
Supplement: oncotarget-08-90852-s001.pdf [file oncotarget-08-90852-s001.pdf]

## **GSTA1 diplotypes affect busulfan clearance and toxicity in children undergoing allogeneic hematopoietic stem cell transplantation: a multicenter study**

### **Supplementary Materials**

**For Supplementary Table see in Supplementary Files**
